# Supplementary material for: Temporal and Spatial Variability of Ammonia in Urban and Agricultural Regions of Northern Colorado, United States
Source: Copernicus journal article supplement (doi:10.5194/acp-2016-1008), 2016-11-23
Supplement: Supplementary file 1 [file acp-2016-1008-supplement.pdf]

# Supporting Material for

## **Temporal and Spatial Variability of Ammonia in Urban and Agricultural Regions of Northern Colorado, United States**

This file includes Table S1 and Fig. S1-S6.

Yi Li<sup>1,5</sup>, Tammy M. Thompson<sup>2</sup>, Martin Van Damme<sup>3</sup>, Xi Chen<sup>1</sup>, Katherine B. Benedict<sup>1</sup>,  
Yixing Shao<sup>1</sup>, Derek Day<sup>2</sup>, Alexandra Boris<sup>1</sup>, Amy P. Sullivan<sup>1</sup>, Jay Ham<sup>4</sup>, Simon  
Whitburn<sup>3</sup>, Lieven Clarisse<sup>3</sup>, Pierre-François Coheur<sup>3</sup> and Jeffrey L. Collett, Jr.<sup>1\*</sup>

<sup>1</sup>Department of Atmospheric Science, Colorado State University, Fort Collins, Colorado,  
USA.

<sup>2</sup>Cooperative Institute for Research in the Atmosphere/NPS, Colorado State University,  
Fort Collins, Colorado, USA.

<sup>3</sup>Atmospheric Spectroscopy, Université Libre de Bruxelles (ULB), Brussels, Belgium

<sup>4</sup>Department of Soil & Crop Sciences, Colorado State University, Fort Collins, Colorado,  
USA.

<sup>5</sup> now, Arizona Department of Environmental Quality, Air Quality Division, Phoenix, AZ,  
USA

---

\*Corresponding author: Jeffrey L. Collett Jr., Department of Atmospheric Science, Colorado State University, Fort Collins, Colorado, 80523, USA (collett@atmos.colostate.edu)

Table S1. Meteorological information near the sites from May to August in each year

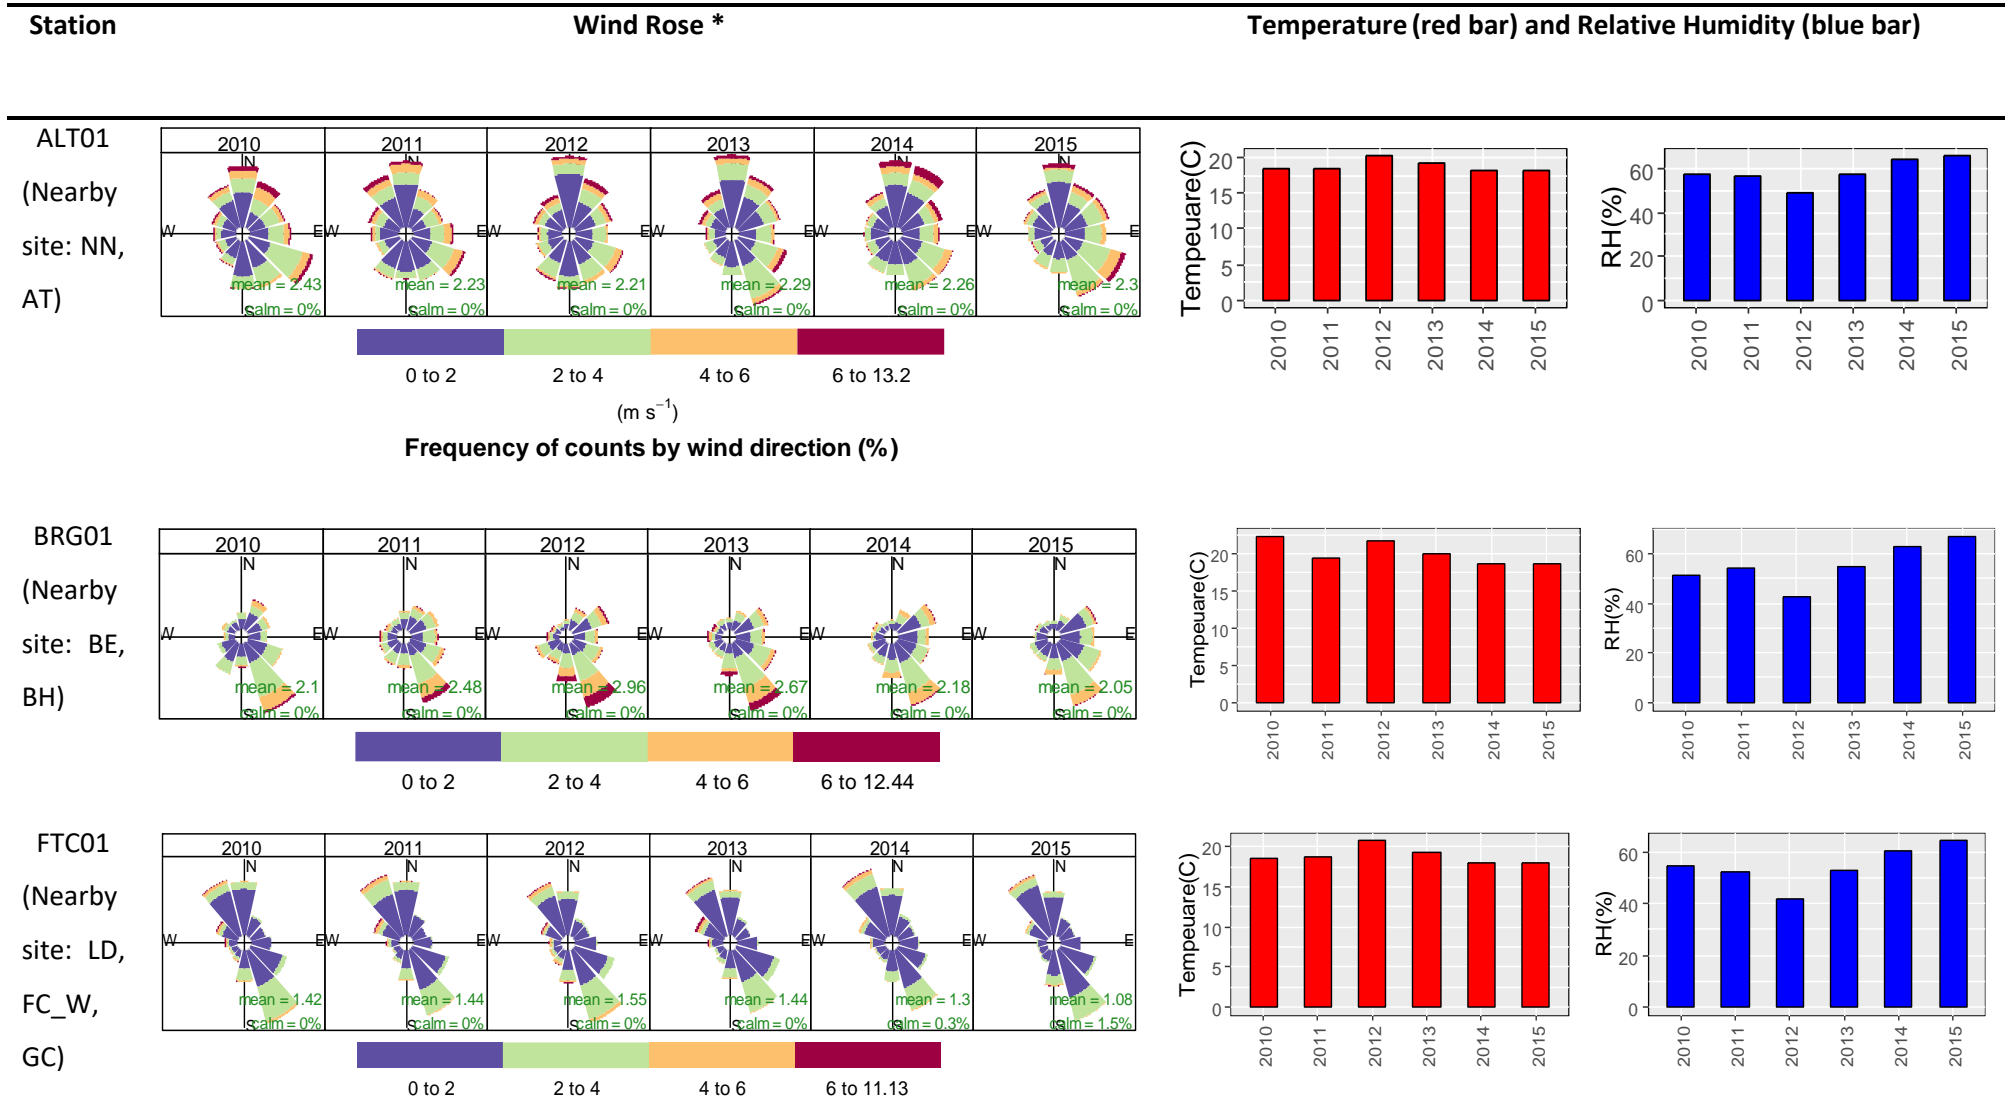

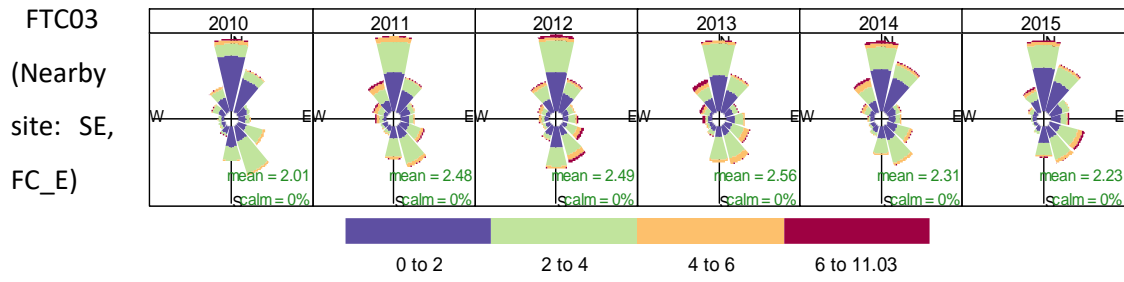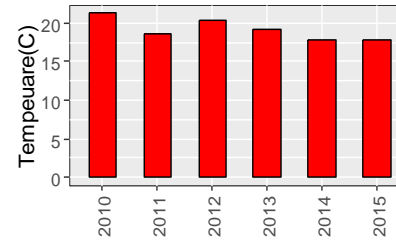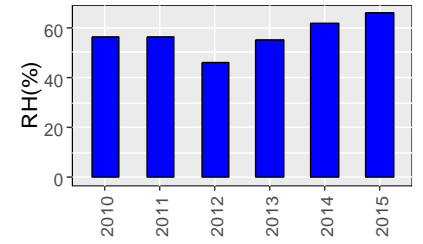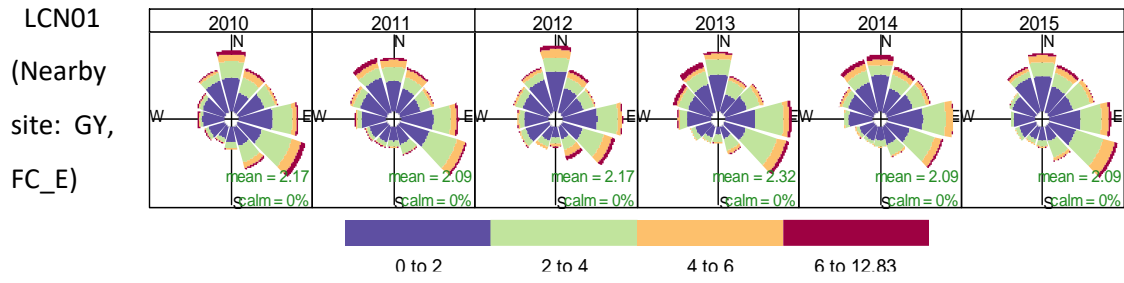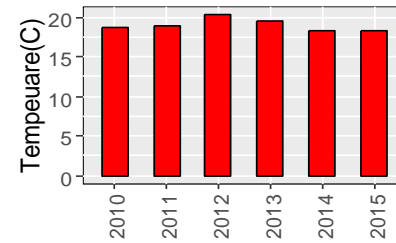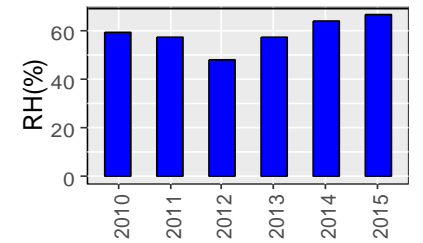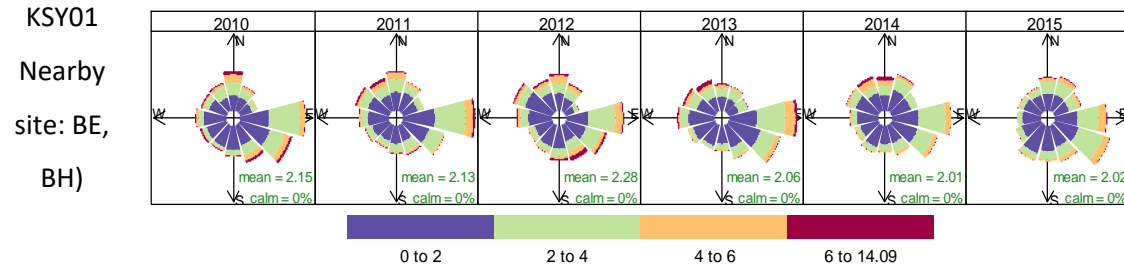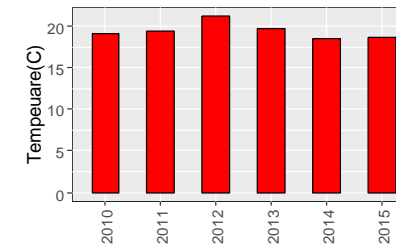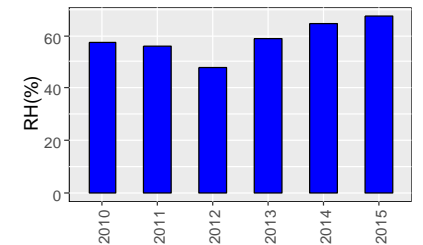

\* Wind speeds (unit: m/s) were indicated by color bars

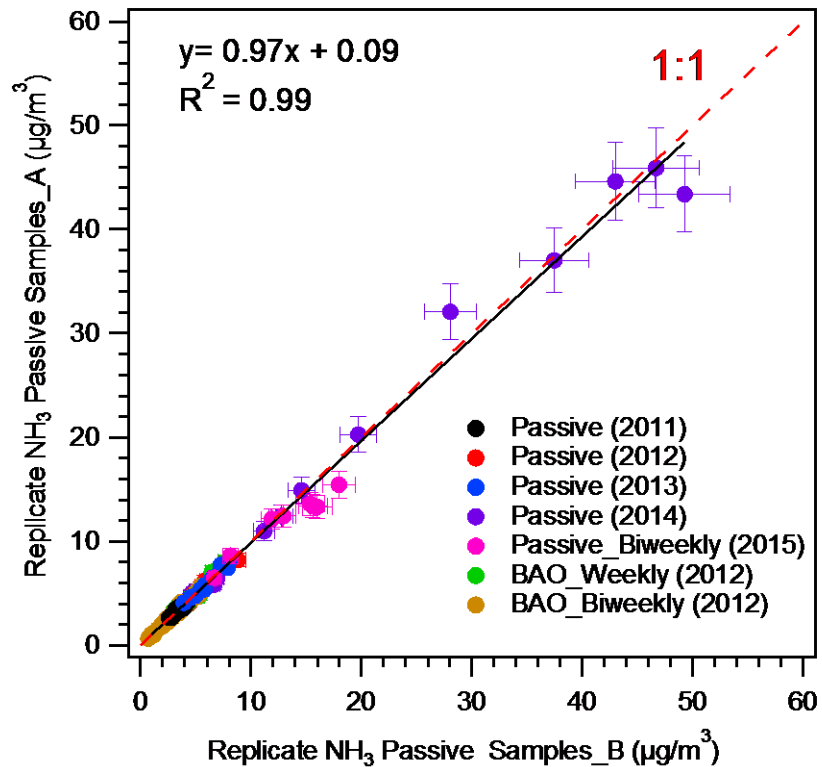

Fig.S1. Comparison of ammonia concentrations measured by replicate passive samples. The error bars represent the relative standard deviation of 8.9 % calculated from all 288 pooled replicate samples.

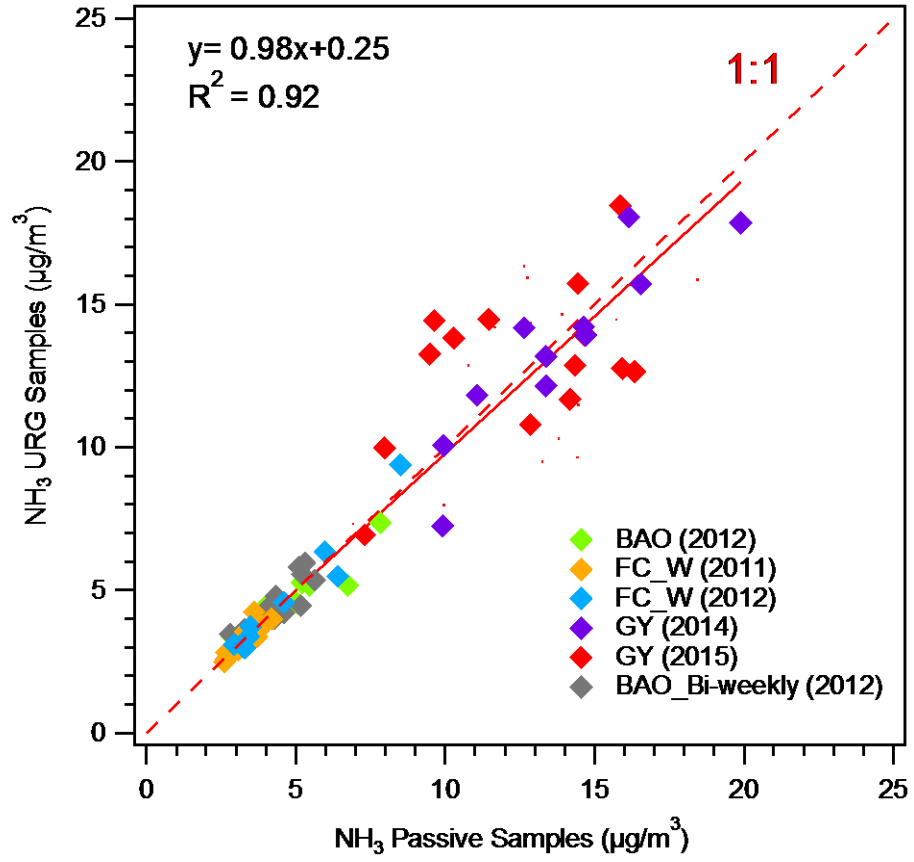

Fig.S2. Comparison of NH<sub>3</sub> concentrations from the Radiello passive samplers and URG samplers.

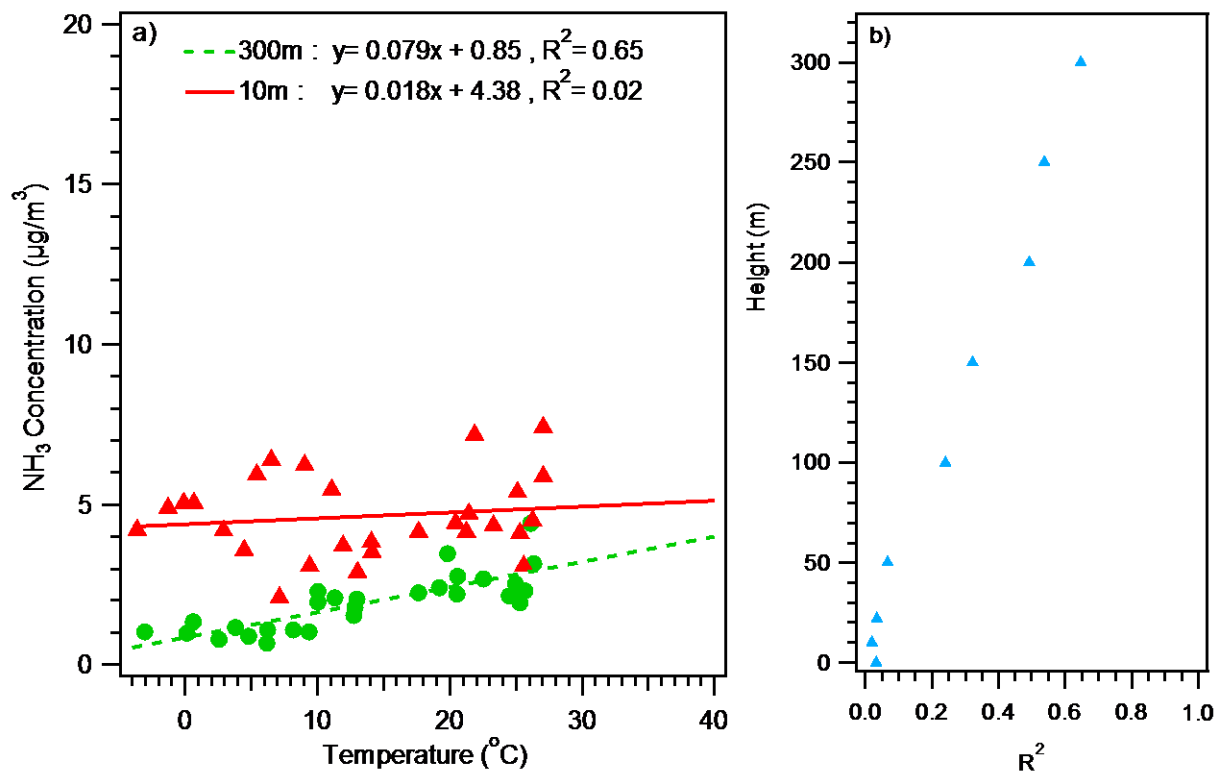

Fig.S3. (a) NH<sub>3</sub> concentration versus temperature at 10 m and 300 m and (b) correlation coefficients between NH<sub>3</sub> concentration and temperatures at different heights of the BAO tower.

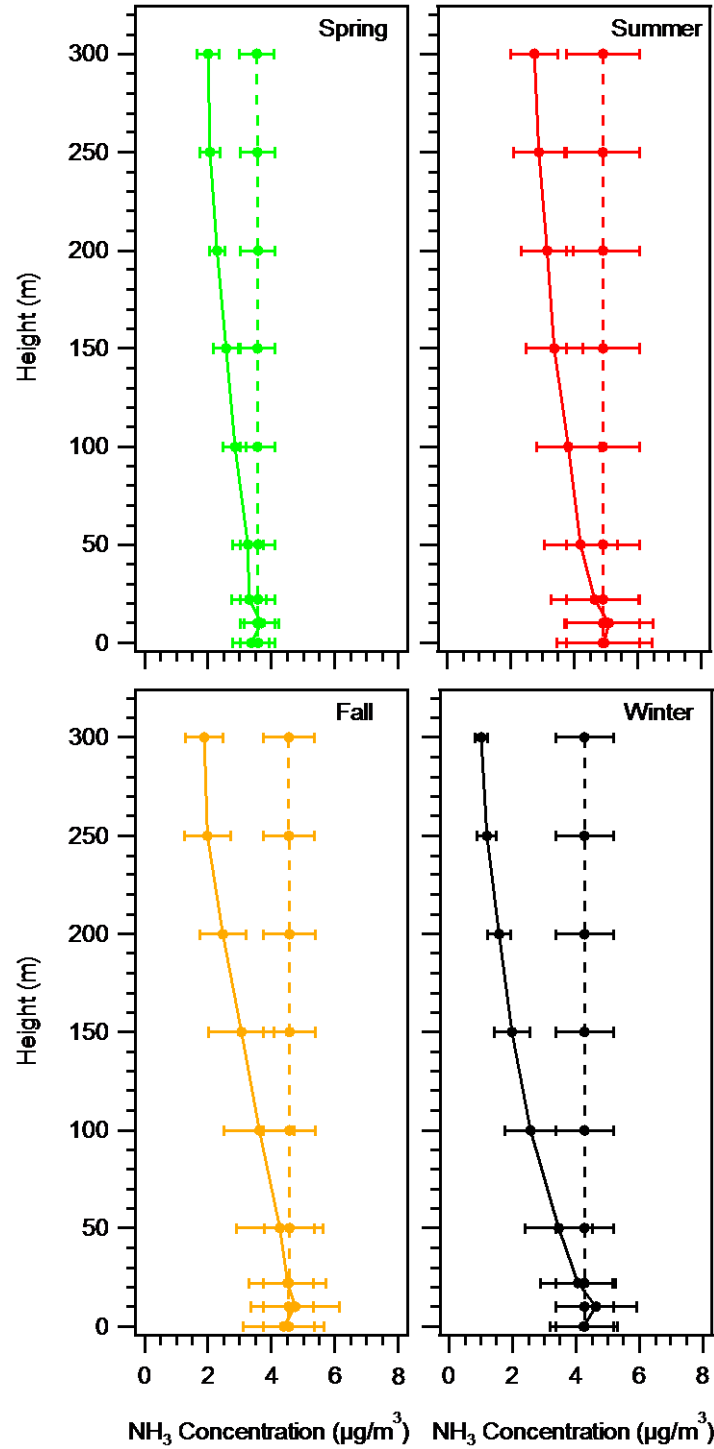

Fig.S4. Seasonal average vertical profiles of NH<sub>3</sub> measured at the BAO tower (solid line) and ISORROPIA II model results (dashed line) in 2012. The x-error bars represent the relative standard deviation of NH<sub>3</sub> concentrations.

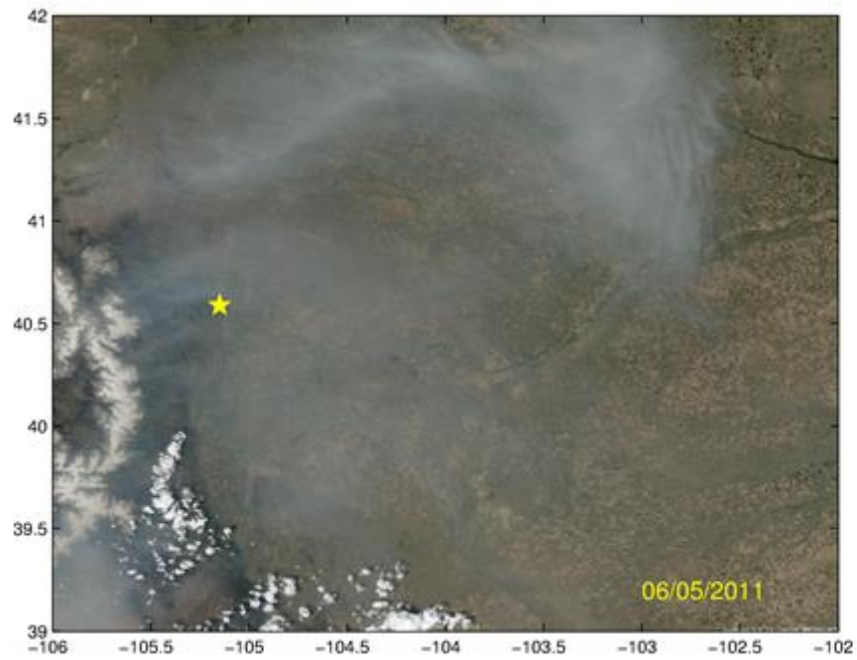

Fig.S5. Satellite image of the wildfire plume over northeastern Colorado caught by the Moderate Resolution Imaging Spectroradiometer (MODIS) (Image downloaded at <http://loatec.univ-lille1.fr/TerreEtCiel/module.php?lang=us>). The FC\_W site is indicated by a yellow star.



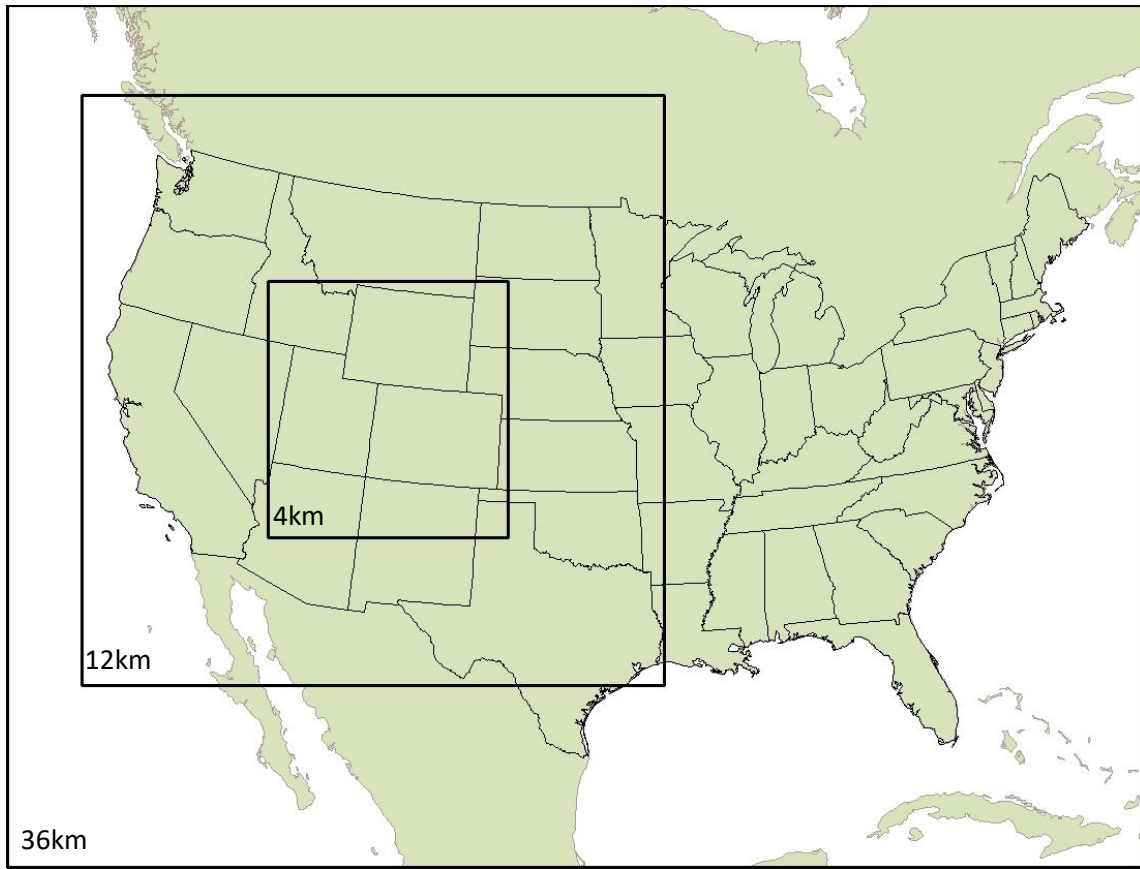

Fig.S6. The 36-km horizontal grid resolution outer domain, represented by the extent of the larger box, covers the contiguous United States, northern Mexico, and southern Canada. The 12-km domain includes states surrounding Colorado. The inner 4-km domain extends over Colorado, Utah, Wyoming and portions of surrounding states.
